# Src acts with WNT/FGFRL signaling to pattern the planarian anteroposterior axis

Nicolle A. Bonar<sup>1</sup>, David I. Gittin<sup>1</sup> and Christian P. Petersen<sup>1,2,\*</sup>

## ABSTRACT

Tissue identity determination is crucial for regeneration, and the planarian anteroposterior (AP) axis uses positional control genes expressed from body wall muscle to determine body regionalization. Canonical Wnt signaling establishes anterior versus posterior pole identities through *notum* and *wnt1* signaling, and two Wnt/FGFRL signaling pathways control head and trunk domains, but their downstream signaling mechanisms are not fully understood. Here, we identify a planarian Src homolog that restricts head and trunk identities to anterior positions. *src-1(RNAi)* animals formed enlarged brains and ectopic eyes and also duplicated trunk tissue, similar to a combination of Wnt/FGFRL RNAi phenotypes. *src-1* was required for establishing territories of positional control gene expression in *Schmidtea mediterranea*, indicating that it acts at an upstream step in patterning the AP axis. Double RNAi experiments and eye regeneration assays suggest *src-1* can act in parallel to at least some Wnt and FGFRL factors. Co-inhibition of *src-1* with other posterior-promoting factors led to dramatic patterning changes and a reprogramming of Wnt/FGFRLs into controlling new positional outputs. These results identify *src-1* as a factor that promotes robustness of the AP positional system that instructs appropriate regeneration.

**KEY WORDS:** Regeneration, Patterning, Axis formation, Wnt, Src, Positional information, Planarian

## INTRODUCTION

Robust pattern control is fundamental to the process of regeneration (Wolpert, 1969). Animals must be able to re-establish tissue identity and proper polarity after injury for regeneration to proceed normally. Furthermore, regardless of regeneration abilities, many animals must also maintain regional identity throughout adult life as they replace and specify new cells to replenish old tissue. Planarians present a powerful system for studying these patterning control mechanisms, as they possess a remarkable ability to regenerate any missing body part and are in a state of constant cellular turnover to replace aged tissues (Elliott and Sanchez Alvarado, 2013; Reddien, 2018; Rink, 2018). Planarian regeneration abilities extend from a population of pluripotent stem cells, termed neoblasts, which continuously produce all adult cell types (Wagner et al., 2011; Zeng et al., 2018). Planarian muscle cells harbor positional information

used in controlling neoblast differentiation and targeting through expression of regionalization determinants termed positional control genes (PCGs) (Witchley et al., 2013; Scimone et al., 2017). PCGs include signaling molecules in the Wnt, FGF and BMP pathways that control tissue identity along the anteroposterior (AP) axis (from head to tail), the dorsoventral (DV) axis (from back to belly) and the mediolateral (ML) axis (from midline to lateral edge). These factors are expressed in regional territories in uninjured animals that are reset during the regeneration process, and their inhibition leads to mispatterning phenotypes. However, the signaling mechanisms controlling positional information domains in muscle are not yet fully understood.

Significant progress has been made in understanding the regeneration of the planarian AP axis, which is driven by Wnt signaling. Several of the nine planarian Wnt genes are expressed in overlapping domains from the posterior, whereas Wnt inhibitors demarcate nested anterior domains. In recent years, functions of many of these factors have been elucidated in the planarian *Schmidtea mediterranea*. A canonical  $\beta$ -catenin-dependent Wnt signaling pathway controls head-versus-tail identity of blastemas after transverse amputation. Downregulation of Wnt pathway components  *$\beta$ -catenin-1*, *wnt1*, *Evi/wntless*, *Dvl-1/2* or *teashirt* causes regeneration of ectopic heads (Petersen and Reddien, 2008, 2009; Gurley et al., 2010; Iglesias et al., 2011; Owen et al., 2015; Reuter et al., 2015) whereas upregulation of canonical Wnt signaling via RNAi inhibition of Wnt negative regulators *notum* and *APC* causes regeneration of ectopic tails (Gurley et al., 2008; Petersen and Reddien, 2011). *wnt1* and *notum* are both transcriptionally induced by injury, during which they likely participate in control of polarization or orientation of outgrowing blastemal tissue. An activin-dependent process restricts the initial 6–18 h of *notum* expression to anterior-facing wounds, resulting in a low Wnt environment leading to head regeneration (Cloutier et al., 2021). At later times in regeneration (by 24–72 h) and throughout homeostasis, stem cell-dependent processes (Hayashi et al., 2011; Currie and Pearson, 2013; März et al., 2013; Scimone et al., 2014; Vasquez-Dorman and Petersen, 2014; Vogg et al., 2014; Tejada-Romero et al., 2015; Schad and Petersen, 2020) generate muscle cells expressing *wnt1* and *notum* at the posterior and anterior midline termini (termed poles), respectively, where they may control region-specific patterning or act at the tip of a hierarchy of AP regulatory factors (Adell et al., 2009; Petersen and Reddien, 2009; Gurley et al., 2010; Stuckemann et al., 2017; Schad and Petersen, 2020).

Other Wnt-dependent pathways may function downstream or in parallel to pole identity and tissue polarization. *wnt11-6* (also known as *wntA*) and associated factors limit the regionalization of head tissue. Inhibition of *wnt11-6* or the *fzd5/8-4* Wnt receptor causes posterior expansion of the brain and formation of ectopic posterior eyes (Kobayashi et al., 2007; Adell et al., 2009; Hill and Petersen, 2015; Scimone et al., 2016). Similarly, RNAi of

<sup>1</sup>Department of Molecular Biosciences, Northwestern University, Evanston, IL 60208, USA. <sup>2</sup>Robert Lurie Comprehensive Cancer Center, Northwestern University, Evanston, IL 60208, USA.

\*Author for correspondence (christian-p-petersen@northwestern.edu)

 C.P.P., 0000-0001-7552-6865

Handling Editor: Cassandra Extavour  
Received 18 August 2021; Accepted 3 March 2022

nou darake (*ndk*), a member of the FGFR-like (FGFRL) family of putative FGF decoy receptors, also results in a brain expansion phenotype along with ectopic posterior eyes (Cebria et al., 2002). The Wnt inhibitor *notum* also acts oppositely in the head regionalization pathway and independent of its roles in *wnt11* polarity signaling. *notum(RNAi)* decapitated animals that succeed in regenerating a head form a miniaturized brain with elongated eyes, and also *notum(RNAi)* regenerating head fragments attain a reduced sized brain and form an ectopic set of anterior eyes (Hill and Petersen, 2015). *notum* likely acts mainly through *wnt11-6* for anterior patterning because co-inhibition of *wnt11-6* suppresses the *notum(RNAi)* phenotypes of small brain and ectopic anterior photoreceptors, whereas co-inhibition of *wnt11* does not modify these phenotypes (Hill and Petersen, 2015, 2018; Atabay et al., 2018). The restricted anterior expression of *notum* also suggests that head patterning is accomplished in part by maintaining a low-Wnt environment in the far anterior. *fzd5/8-4* and *ndk* expression is also restricted to anterior regions, whereas *wnt11-6* expression is prominent in the posterior brain and also present in body wall muscle across much of the AP axis. These factors are expressed constitutively, and their inhibition in uninjured animals leads to mispatterning phenotypes similar to those in regenerating animals (Hill and Petersen, 2015). Therefore, planarians use ongoing Wnt/FGFRL positional information to maintain anterior regionalization.

A separate set of Wnt-related and FGFRL genes control trunk identity in planarians. Inhibition of *ndl-3* (a FGFRL protein), *ptk7* (a kinase-dead Wnt co-receptor), *wntP-2* (Wnt ligand also called *wnt11-5*) (Gurley et al., 2010) or *fzd1/2/7* (Wnt receptor) causes posterior trunk duplication, with animals forming secondary mouths and ectopic pharynges (Lander and Petersen, 2016; Scimone et al., 2016). Similar to the anterior signals discussed above, these trunk patterning factors are required homeostatically and expressed regionally. *wntP-2* is expressed in an animal-wide posterior-to-anterior gradient, *ptk7* is expressed in a trunk-centered gradient and *ndl-3* is expressed prepharyngeally. The head and trunk Wnt/FGFRL systems appear to act distinctly, because inhibition of each system does not influence the phenotypic output of the other. Together, these findings suggest that body-wide systems of Wnt-FGFRL signaling convey positional information needed for regeneration and homeostatic tissue maintenance. Additional factors have been identified, such as *nr4A* and *pbx*, regulating patterning at the termini (Blassberg et al., 2013; Chen et al., 2013; Li et al., 2019), *prep* transcription factor regulating the anterior (Felix and Aboobaker, 2010) and *sp5* transcription factor regulating territory within the tail (Tewari et al., 2019). In addition, Wnt and Activin signaling regulate fissioning behavior as well as latent transverse regions prone to scission under pressure which mark sites of fissioning (Arnold et al., 2019). However, the downstream signaling factors important for body regionalization along the AP axis have not been fully resolved. In addition, it is not clear how signals from Wnt/FGFRL signaling along the AP axis relate to the canonical Wnt signaling used at the axis termini. Here, we identify *src-1* as a global suppressor of anterior identities that can operate independently of pole formation. Our analysis indicates that *src-1* likely acts in parallel or downstream of pathways involving Wnt and FGFRL factors to restrict anterior tissue identities in planarians.

## RESULTS

### Planarian *src-1* suppresses head and trunk identity

To identify new regulators of regeneration patterning in planarians, we conducted an RNAi screen of 175 genes enriched for intracellular and receptor kinase activity (Table S1). Inhibition of

58 of these genes caused regeneration defects spanning from reduced blastema formation (21 genes), to aberrant photoreceptor formation (16 genes), to impaired movement behavior (5 genes). From this set, we identified a rare phenotype of ectopic eye formation in regeneration, due to inhibition of dd3147, an Src-family kinase that we named *src-1* (Fig. 1A; Fig. S1A). A Src-like gene had been cloned from planaria previously but its functional roles in regeneration were unknown (Burgaya et al., 1994). We isolated the *src-1* clone and further analyzed this phenotype by staining to examine *src-1* requirements in body patterning. qPCR verified the effectiveness of the *src-1* dsRNA for *src-1* knockdown (Fig. S1B). Control animals regenerated two eyes as observed in live animals and measured by double fluorescence *in situ* hybridization (FISH) detecting both *opsin* (eye photosensory neurons) and *tyrosinase* (eye pigment cup cells) (Fig. 1A). By contrast, *src-1(RNAi)* animals formed ectopic posterior eyes in addition to their normal eyes (Fig. 1A-C). Ectopic posterior photoreceptors formed in *src-1(RNAi)* regenerating fragments at a gradation of penetrance, highest in regenerating head fragments (89%, 180/203 animals), lower in regenerating trunk fragments (56%, 114/204 animals) and lowest in regenerating tail fragments (26%, 49/189). Therefore, *src-1* was most strongly required in anterior regions to prevent their posteriorization. In addition, animals inhibited homeostatically for *src-1* also formed ectopic posterior eyes (Fig. S1C), indicating that *src-1* activity also maintains pattern through tissue turnover.

The *src-1(RNAi)* eye phenotype was reminiscent of the phenotypes observed for *ndk*, *wnt11-6* and *fzd5/8-4* RNAi that also resulted in the formation of a larger brain (Cebria et al., 2002; Hill and Petersen, 2015; Scimone et al., 2016). Therefore, we sought to determine whether *src-1(RNAi)* animals similarly formed a larger brain. We investigated the size of the brain in *src-1(RNAi)* animals by examining the expression of several brain markers. *src-1(RNAi)* animals indeed formed a larger brain than controls that was posteriorly expanded in both regenerating head fragments stained with *gluR* or *cintillo* riboprobes (Fig. 1B) and regenerating trunk fragments stained with *chat* or *cintillo* (Fig. 1C; Fig. S1C). Likewise, animals inhibited homeostatically for *src-1* also formed expanded brains (Fig. S1C). Thus, we conclude that *src-1* acts to suppress head identity in general, similar to *wnt11-6* or *ndk* factors.

Given the requirement for *src-1* in regionalizing head identity, we tested whether it acted specifically in this process versus more generally in other AP patterning. Several factors have been implicated in restricting trunk identity to a more anterior position, and these do not appear to influence head patterning: *fzd-1/2/7*, *ndl3*, *ptk7* and *wntP-2* (Sureda-Gomez et al., 2015; Lander and Petersen, 2016; Scimone et al., 2016). Similar to inhibition of these regulators, *src-1(RNAi)* regenerating trunk fragments formed a secondary posterior pharynx (marked by *laminin* expression), at ~30% penetrance (Fig. 1C). Similar to previous observations for inhibition of *ndl-3*, *ptk7* and *wntP-2* (Sureda-Gomez et al., 2015; Lander and Petersen, 2016; Scimone et al., 2016), ectopic pharynx phenotypes in *src-1(RNAi)* animals were only observed in regenerating trunk fragments possessing a pre-existing pharynx and not, for example, in regenerating head fragments (Fig. 1B). Together, we conclude that *src-1* anteriorly limits both trunk and head domains and can act similarly to both the anterior and posterior Wnt/FGFRL systems.

### *src-1* is broadly expressed in both muscle and non-muscle cells

We next investigated whether *src-1* could control PCG expression as part of its function to regulate anterior patterning. We found *src-1*

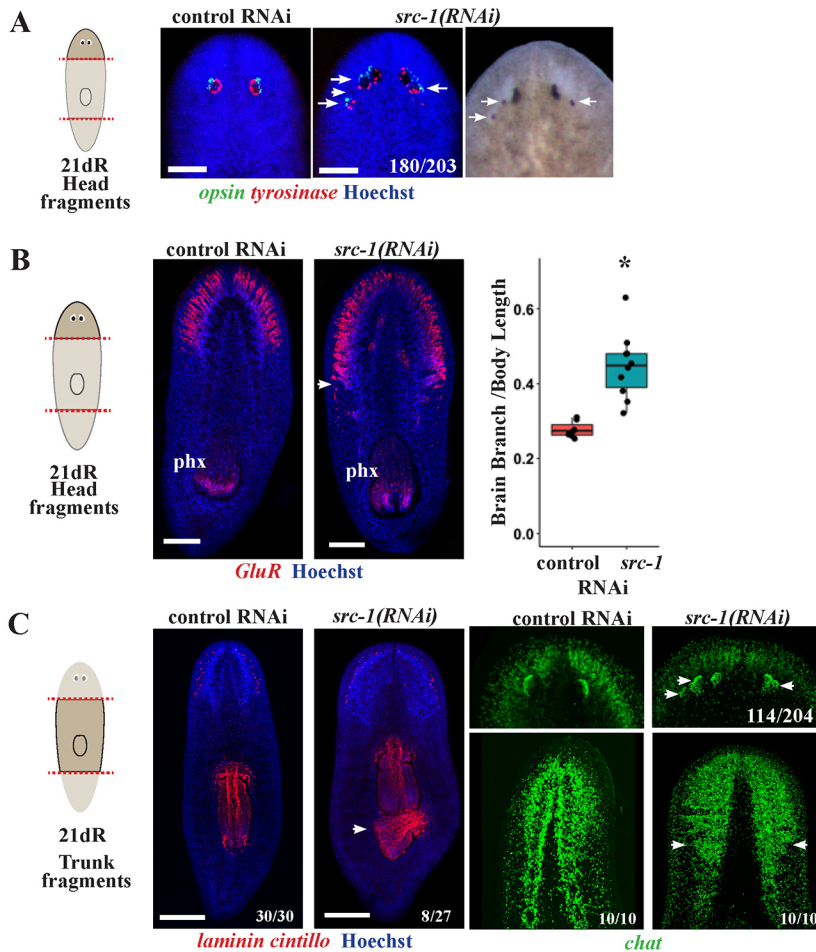

**Fig. 1. *src-1* restricts head and trunk identity to anterior positions.** (A) *src-1(RNAi)* animals undergoing tail regeneration formed ectopic posterior eyes expressing *opsin* and *tyrosinase*. (B) *src-1(RNAi)* animals undergoing tail regeneration formed a larger brain, as evidenced by *GluR* expression, a marker of planarian brain branches. *GluR* also stains the pharynx (phx). Regenerating *src-1(RNAi)* head fragments formed a single pharynx, similar to control animals (10/10 animals). Right: quantification of brain branch length by *GluR* expression proportional to body length. \* $P < 0.05$  (unpaired two-tailed *t*-test). Box plot shows median values (middle bars) and first to third interquartile ranges (boxes); whiskers indicate 1.5× the interquartile ranges and dots are individual data points. (C) Regenerating *src-1(RNAi)* trunk fragments formed a posterior secondary pharynx (2 of 10 animals) as marked by *laminin* expression and a larger brain (10 of 10 animals) as marked by *cintillo* and *chat* expression. *chat*<sup>+</sup> photoreceptor neuron staining showed that 114/204 animals had an extra set of eyes posteriorly. White arrows indicate ectopic structures. Scale bars: 150  $\mu$ m (A); 300  $\mu$ m (B,C).

mRNA to be broadly expressed throughout the animal without gradient-like properties, differing from known PCGs (Fig. S2A). *src-1* expression was detected in both muscle and non-muscle cells (Fig. S2B) as measured by co-FISH with the muscle marker *collagen*. These observations are consistent with single-cell RNA sequencing which found *src-1* as widely expressed in a wide variety of cell types, including muscle (Wurtzel et al., 2015) (Fig. S2C). Therefore, it is possible that *src-1* could act in muscle cells to regulate anterior identity in planarians, or alternatively influence patterning in some other way.

Muscle cells themselves are required for positional information, because selective depletion of muscle subtypes causes mispatterning phenotypes. For example, longitudinal muscle is lost after *myoD* RNAi and circular muscle is lost after *nkx1-1* RNAi, resulting in altered PCG expression (Scimone et al., 2017). Therefore, we sought to determine whether *src-1* RNAi phenotypes could be explained by the absence of muscle cell bodies or their fiber projections. Immunostainings showed that *src-1(RNAi)* animals possessed muscle fibers stained with the 6G10 antibody and we could not detect any consistent differences in this pattern compared with control conditions (Fig. S2D). In addition, muscle cell bodies labeled by collagen mRNA were also present in apparently normal distributions in regenerating *src-1(RNAi)* animals (Fig. S2E). Although it remains possible that *src-1* influences muscle fiber orientation and/or muscle cell bodies in a subtle way, these results suggest that *src-1* regulates anterior patterning not through affecting muscle formation but instead by signaling within muscle or in other cell types.

### ***src-1* can pattern the AP axis independently from pole identity**

We next tested whether expansion of the head region in *src-1(RNAi)* animals may result from changes in the *notum*-expressing anterior pole. We found that *notum* was asymmetrically expressed in *src-1(RNAi)* animals at 18 h after amputation, similar to controls (Fig. S3A) and consistent with the observation that, under these conditions, *src-1(RNAi)* animals did not have impaired axis polarization. At 72 h, *notum* expression was anterior but localized more broadly and with apparently reduced intensity along the midline after *src-1* RNAi, suggestive of an early disturbance in pole formation (Fig. S3B). By 14 days after amputations, however, all *src-1(RNAi)* animals had succeeded in regenerating a *notum*<sup>+</sup> anterior pole, which was mildly expanded laterally, and they regenerated pole-expressed *foxD* (Fig. S3B-E). *notum* is also expressed in anterior midline neurons of the brain (Hill and Petersen, 2015; Scimone et al., 2020), and in *src-1(RNAi)* animals brain-associated *notum* expression expanded posteriorly in concert with the expanded brain (Fig. S3C,D).

In contrast to *notum*, *wnt1* is expressed at both the anterior- and posterior-facing wounds and is required for formation of the posterior pole in regenerating animals. Regenerating *src-1(RNAi)* animals had normal wound-induced *wnt1* expression at 18 h and formed a posterior pole by 72 h post amputation (Fig. S3A,B). Furthermore, after 14 days regeneration or homeostatic inhibition, *src-1(RNAi)* animals had a normal *wnt1*<sup>+</sup> posterior pole (Fig. S3C,D). Thus, *src-1* inhibition did not strongly affect establishment or maintenance of the posterior pole under

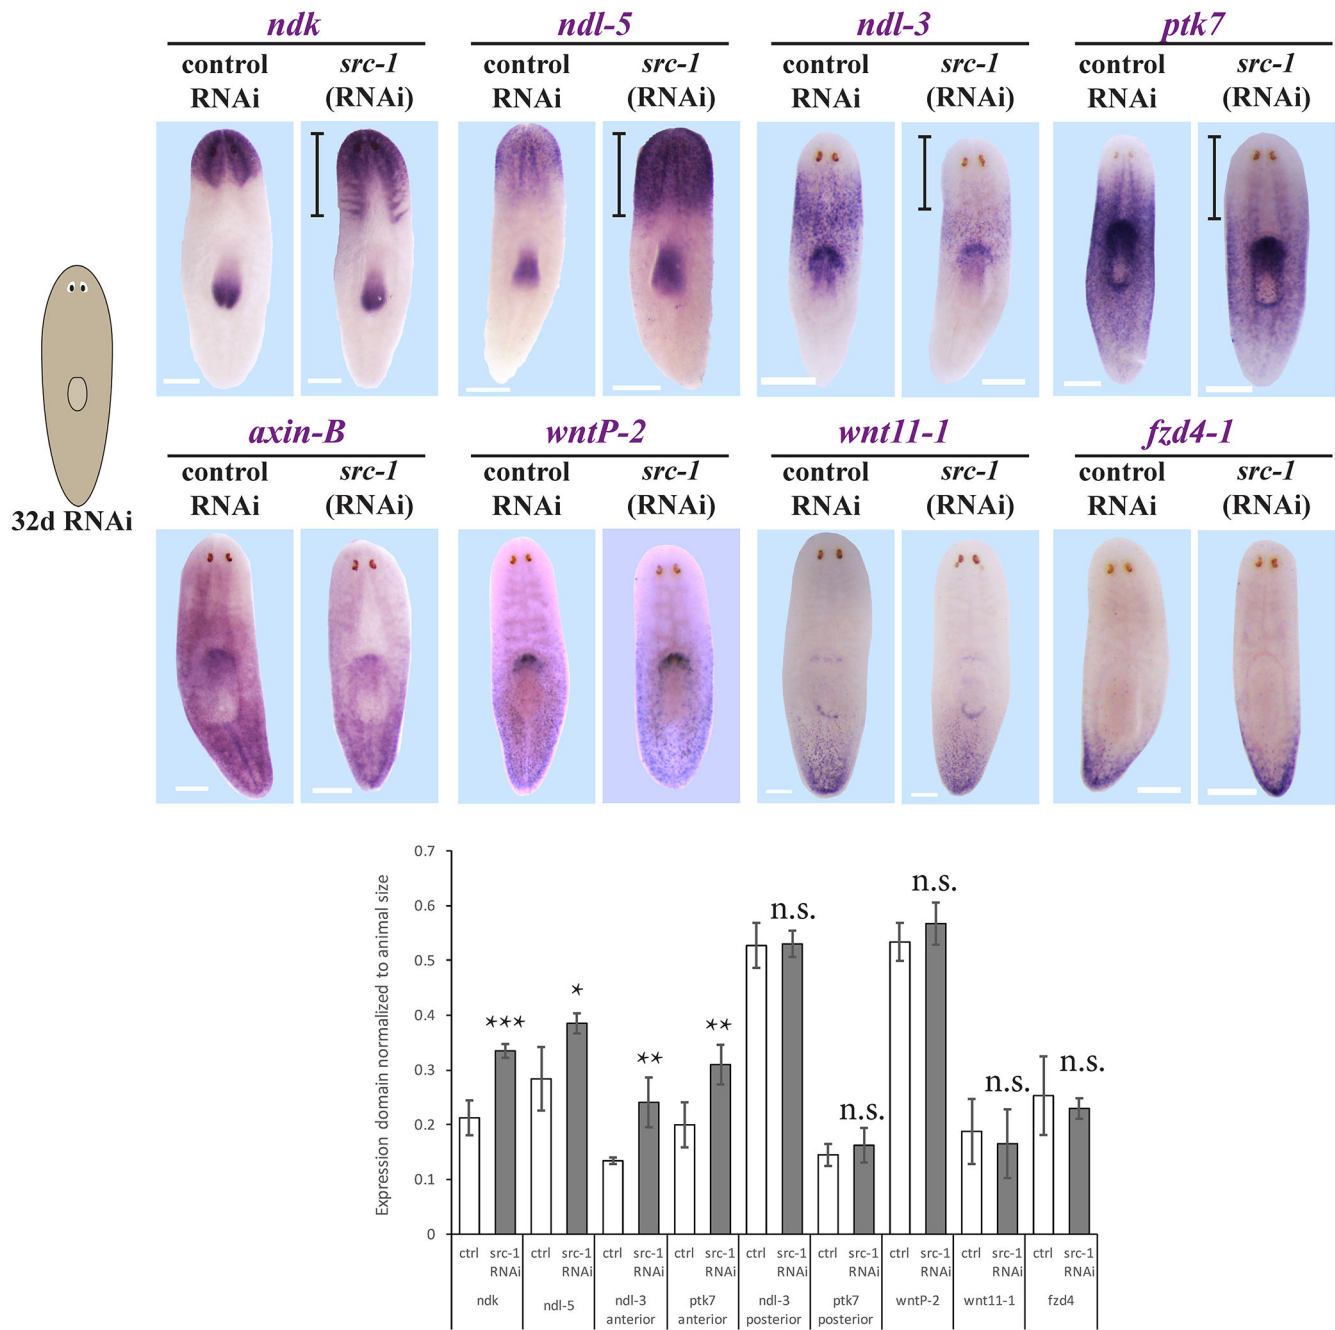

**Fig. 2. Anterior and central PCG domains are modified by *src-1* RNAi.** Top: uninjured *src-1*(RNAi) or control RNAi animals stained for PCG domain expression by whole-mount *in situ* hybridization as indicated after 32 days of gene inhibition. Black bars indicate expression ranges modified from control conditions. Bottom: quantifications of expression domains measured as a fraction of total animal length. Below, the PCG expression domain features were measured from the anterior animal tip (*ndk*, *ndl-5*, *ndl-3* anterior boundary, *ptk7* anterior boundary, *ndl-3* posterior boundary) or from the posterior tip (*ptk7* posterior boundary, *wntP-2*, *wnt11-1*, *fzd4*). At least four animals were used in each measurement. \* $P < 0.05$ , \*\* $P < 0.01$ , \*\*\* $P < 0.001$  (unpaired two-tailed *t*-test). n.s.,  $P > 0.05$ . *axinB* expression was continual across the axis and so could not be confidently scored in this way, and 4/4 animals appeared as shown. *src-1* inhibition caused a posterior shift to the anterior and central PCG domains (*ndk*, *ndl-5*, *ndl-3* anterior boundary, *ptk7* anterior boundary) and no significant change to posterior PCG domains. Scale bars: 200  $\mu$ m.

conditions that nonetheless led to brain expansion. Posterior and anterior pole formation depends strongly on  $\beta$ -catenin-1 and APC, suggesting that *src-1* can act independently of these factors.

#### ***src-1* regulates expression of body-wide AP patterning factors**

Given the expansion of anterior tissues in *src-1*(RNAi) animals, we tested whether the domains of PCGs were similarly modified. Both

regenerating and uninjured *src-1*(RNAi) animals had expanded domains of anterior PCGs *ndk* and *ndl-5* (Fig. 2; Fig. S4). We next investigated possible *src-1*-dependent regulation of trunk patterning factors *ndl3*, *ptk7* and *wntP-2* (Lander and Petersen, 2016; Scimone et al., 2016). *src-1* inhibition resulted in the reduction of the anterior boundary of *ndl3* and *ptk7* within the pre-pharyngeal region but did not impact their posterior boundary (Fig. 2). These observations suggest *src-1* acts to restrict the anterior domain in planarians and

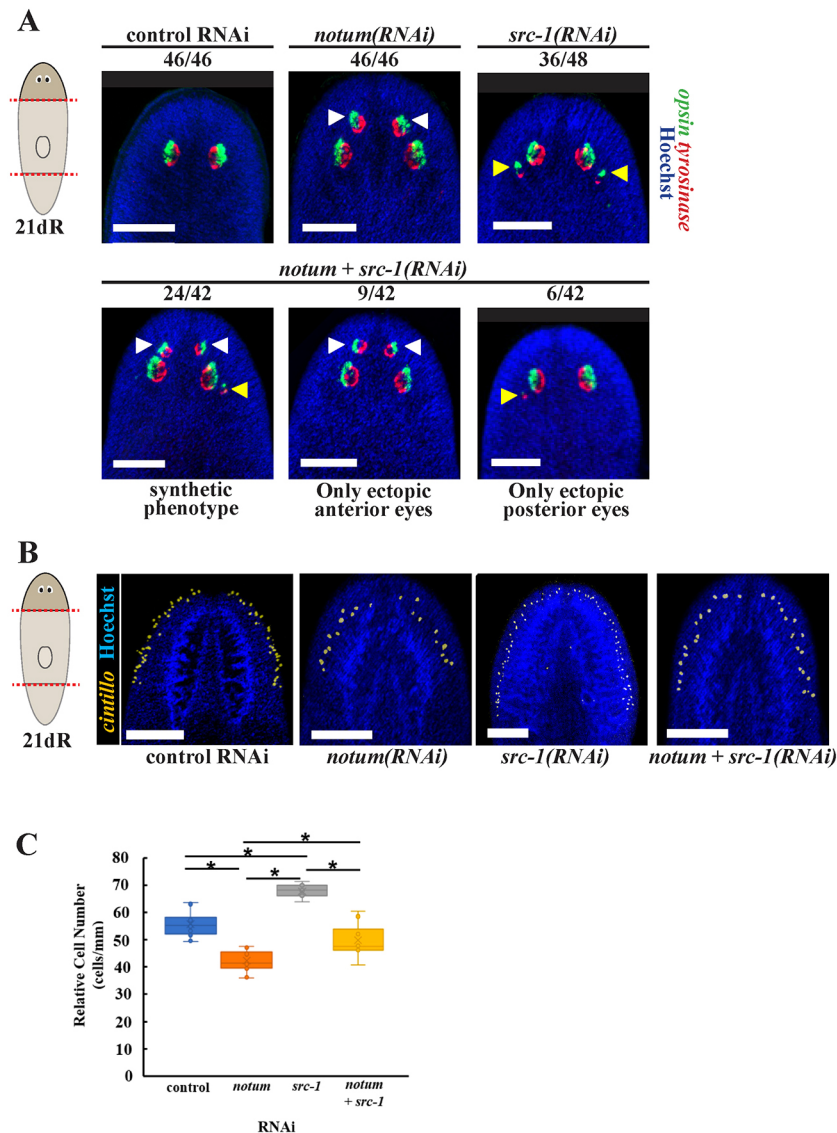

**Fig. 3. *notum* and *src-1* can act independently to determine eye placement.** (A) FISH to detect expression of *opsin* (green), a marker of photoreceptor neurons, and *tyrosinase* (red), a marker of pigment cup cells, in control, *src-1*, *notum* and *src-1+notum*(RNAi) regenerating head fragments. Hoechst (blue) was used as counterstain to detect nuclei. Ectopic eyes are marked by white arrows versus unmarked pre-existing eyes. *notum*(RNAi) caused formation of anterior ectopic eyes and *src-1*(RNAi) caused the formation of posterior ectopic eyes, whereas simultaneous inhibition of *src-1* and *notum*(RNAi) resulted in a synthetic phenotype in 24/42 animals with both anterior and posterior ectopic eyes. (B) FISH to detect expression of *cintillo* (red), a marker of chemosensory neurons, in control, *src-1*, *notum* and *src-1+notum*(RNAi) regenerating head fragments. (C) Quantification of *cintillo*+ cell number normalized to animal size. \* $P < 0.05$  (unpaired two-tailed *t*-test). Box plot shows median values (middle bars) and first to third interquartile ranges (boxes); whiskers indicate 1.5 $\times$  the interquartile ranges and dots are individual data points. *notum*(RNAi) caused the regeneration with reduced numbers of *cintillo*+ cells, and *src-1*(RNAi) caused formation of greater numbers of *cintillo*+ cells. Simultaneous inhibition of *src-1* and *notum* resulted in an intermediate number of these cells. Scale bars: 150  $\mu$ m.

allows for the possibility that *src-1* could be activating *ndl-3* and *ptk7* expression in order to control trunk identity. We then examined the effect of *src-1* inhibition on the trunk PCG *wntP-2*, expressed in a posterior-to-anterior gradient. *wntP-2* expression was unchanged in *src-1*(RNAi) uninjured animals (Fig. 2). *axinB* is a negative regulator of Wnt/ $\beta$ -catenin signaling in planarians, inhibition of which results in two-tailed planarians, and it is expressed similarly to *wntP-2* in a posterior-to-anterior gradient (Iglesias et al., 2011). Axins are feedback inhibitors of  $\beta$ -catenin signaling, and thus axin expression marks locations of canonical Wnt pathway activity. Unlike  *$\beta$ -catenin-1* RNAi (Lander and Petersen, 2016), *src-1* inhibition did not eliminate *axinB* expression, but because of the low expression of the *axinB* transcript in these experiments, we could not unambiguously rule out the possibility that *src-1* inhibition mildly modifies *axinB* expression in some way. However, this analysis suggests that *src-1* inhibition likely does not eliminate  $\beta$ -catenin signaling along the body axis, similar to previous observations made after *wntP-2* and *ptk7* RNAi (Fig. 2) (Lander and Petersen, 2016). Likewise, expression of posterior markers *fzd-4* and *wnt11-1* was unchanged in *src-1*(RNAi) animals (Fig. 2). Together, these observations point to a primary role for *src-1* in controlling anterior and central PCG expression domains.

### ***src-1* likely acts independently of *notum/wnt11-6* in head patterning**

Srcs are intracellular tyrosine kinases that can act as a signaling hub of multiple pathways and influence many cellular processes (Parsons and Parsons, 2004). Given that *src-1* inhibition shifts anterior PCG domains and results in brain expansion and posterior ectopic eye phenotypes reminiscent of *ndk* and *wnt11-6* RNAi (Cebria et al., 2002; Hill and Petersen, 2015), we sought to determine whether *src-1* might signal downstream of either factor. To begin to address this question, we designed epistasis experiments using double RNAi. *notum*(RNAi) head fragments form an ectopic set of eyes within the head tip anterior to the pre-existing photoreceptors, whereas *wnt11-6*(RNAi) head fragments form an ectopic set of eyes posterior to the pre-existing eyes. Concurrent inhibition of *notum* and *wnt11-6* has been shown to suppress the anterior ectopic photoreceptor, arguing that *wnt11-6* likely acts downstream and oppositely to *notum* in head patterning (Hill and Petersen, 2015). We reasoned that if *src-1* acted primarily downstream of *wnt11-6*, and therefore of *notum* in the anterior, then dual inhibition of *notum* and *src-1* should produce the posterior ectopic eye and enlarged brain phenotypes seen in single inhibition of *src-1* while suppressing the *notum*(RNAi) anterior eye

phenotypes. Instead, simultaneous inhibition of *notum* and *src-1* in amputated head fragments produced several different phenotypes: 24 of 42 animals exhibited a synthetic phenotype with both posterior and anterior photoreceptors, 9 of 42 animals had a *notum(RNAi)* phenotype with only anterior photoreceptors, 6 of 42 animals exhibited a *src-1(RNAi)* phenotype of only posterior photoreceptors, and 3 of 42 animals appeared normal (Fig. 3A). In a majority of cases, the synthetic phenotypes occurred with only a single posterior ectopic eye but two anterior ectopic eyes as shown, but we identified a small number of cases of such animals in which two posterior eyes were symmetrically formed (2/42 animals). The observation of a synthetic phenotype after inhibition of both *src-1* and *notum* at this frequency (in ~50% of animals) indicates these factors can exert distinct influences and strongly suggests that *src-1* can act independently of *notum*, and therefore likely of *wnt11-6*, for controlling anterior identity. In support of this model, simultaneous inhibition of *notum* and *src-1* in amputated head fragments led to a brain size (as measured by *cintillo+* cell number) that was neither small like *notum(RNAi)* nor large like *src-1(RNAi)* but instead a size in between the two RNAi phenotypes (Fig. 3B,C).

### ***src-1* and *wnt11-6* both act distinctly from *ndk* to define the location of eye regeneration**

We next sought to test the possibility that *src-1* might transduce signaling through *ndk*. NDK/FGFRL receptors have ectodomains capable of binding FGFs but lack intracellular kinase domains to transduce signals, so have been proposed to act as FGF pathway decoy receptors. However, planarian FGF ligands have not been implicated in AP patterning, so it is unclear what other pathway components signal via planarian FGFRLs. The short intracellular domain of FGFRLs could be capable of recruiting other types of signaling models, so we considered the possibility that FGFRLs might signal through *src-1* by a close examination of the *ndk(RNAi)* versus *src-1(RNAi)* phenotypes. The *ndk* RNAi phenotype typically involves production of ectopic eyes at a more posterior location than *src-1* RNAi, giving some support for the distinct action of these factors.

We further probed the characteristics of the ectopic eyes in each RNAi condition, taking advantage of a newly identified distinction between *wnt11-6(RNAi)* and *ndk(RNAi)* conditions in controlling the location of eye regeneration after eye removal (Atabay et al., 2018; Hill and Petersen, 2018). Planarians under normal conditions can regenerate their eyes within ~7 days after surgical removal. However, pattern disruption phenotypes resulting in ectopic eyes have distinct properties with respect to the location of regeneration after removal of ectopic versus pre-existing eyes. If the original, pre-existing photoreceptors in *wnt11-6(RNAi)* animals were surgically removed, they did not regenerate (11/11 animals). By contrast, when the ectopic photoreceptors of *wnt11-6(RNAi)* animals were surgically removed, new photoreceptors regenerated in that location a majority of the time (6/9 animals) (Fig. 4). These results are consistent with previous studies (Atabay et al., 2018; Hill and Petersen, 2018) showing similar behavior for eyes in animals inhibited simultaneously for *wnt11-6* and *fzd5/8-4*. These results suggest that *wnt11-6* and *fzd5/8-4* signals control a target location for eye regeneration at a particular AP position in the animal. By contrast, eye regeneration in *ndk(RNAi)* animals does not share this property, because in these animals removal of the pre-existing eyes still allowed for regeneration at that position most of the time (62%, 8/13 animals), whereas removal of ectopic photoreceptors did not lead to eye regeneration in a majority of animals (85%, 11/13 animals) (Fig. 4) (Hill and Petersen, 2018). Therefore, *ndk* RNAi

alters the overt pattern of animals without modifying the *wnt11-6*-dependent system directing the position of new eye regeneration.

We reasoned that if *src-1* acted downstream of *ndk* to promote anterior identities, then as observed in *ndk(RNAi)*, the ectopic eyes in *src-1(RNAi)* animals would be incapable of regenerating, but regeneration of pre-existing eyes would succeed. To test this model, we resected ectopic and pre-existing eyes from a cohort of homeostatic *src-1(RNAi)* animals then tracked each animal and eye profile individually over 22 days of recovery. Regeneration failed at the location of nearly all *src-1(RNAi)*-transected pre-existing eyes (10 of 11 animals), and by contrast regeneration succeeded at the sites of transected ectopic eyes at a frequency (5 of 11 animals) close to that seen in *wnt11-6(RNAi)* animals (Fig. 4). These results indicate that the site of eye regeneration is stably shifted after either *wnt11-6* or *src-1* RNAi but not after *ndk* RNAi. Therefore, *src-1* likely acts independently from *ndk*. Taken together, the double-RNAi and eye regeneration tests suggest that *wnt11-6*, *src-1* and *ndk* likely control separate processes important in head patterning.

### ***src-1* inhibition broadly sensitizes animals to AP pattern disruption**

Given these findings of broadly parallel action, along with the role of *src-1* in maintaining anterior PCG domains, we reasoned that *src-1* inhibition might be capable of exerting a broader influence on positional signaling. To test this possibility, we carried out a series of double-RNAi experiments between *src-1* and other PCGs and examined effects on head and trunk patterning. We first simultaneously inhibited *src-1* with the head patterning factors *wnt11-6*, *ndk* and *fzd5/8-4*, each known to restrict eye cell number and brain size from more posterior regions, but which do not normally influence trunk identity in planarians (Scimone et al., 2016). Strikingly, when *src-1* was simultaneously inhibited with *wnt11-6*, *ndk* or *fzd5/8-4*, animals had dramatically increased numbers of ectopic posterior eyes compared with any single gene RNAi conditions (Fig. 5A). In addition, the double-RNAi animals had more severely expanded brains as measured by counting *cintillo+* chemosensory cells (Fig. S5). Thus, inhibition of Src with anterior-specialized Wnt and FGFRL signals leads to enhanced anterior transformations.

Next, we tested the effects of simultaneous *src-1* inhibition with the patterning factors known to restrict trunk but not head identity in planarians (Lander and Petersen, 2016; Scimone et al., 2016). We used laminin and Hoechst staining to test double-RNAi animals for their ability to form a secondary or tertiary pharynx. *src-1* inhibition enhanced the penetrance of the ectopic pharynx phenotype after inhibition of *ndl-3* [from 11% in *ndl-3(RNAi)* to 40% in *ndl-3+src-1(RNAi)*] and *ptk7* [from 5% in *ptk7(RNAi)* to 58% in *ptk7+wntP-2(RNAi)*]. Under these conditions, single-gene inhibition of *wntP-2* led to an already highly penetrant trunk duplication phenotype (88%), and although *src-1(RNAi)* did increase this slightly (94%), *src-1+wntP-2* RNAi caused a higher expressivity of forming two ectopic pharynges (Fig. 5B). Together these results indicate the *src-1* inhibition sensitizes animals to disruption of either head or trunk control systems.

The head and trunk PCG systems are thought to act independently, so we investigated whether *src-1* co-inhibition with PCGs might reveal hidden dependencies in the outputs to these systems. To test this, we inhibited *src-1* along with *ndl-3*, *ptk7* or *wntP-2* and tested for effects on head patterning by counting *cintillo+* cells (Fig. S5) and likewise inhibited *src-1* along with *ndk* and *wnt11-6* and tested for effects on trunk patterning by staining for

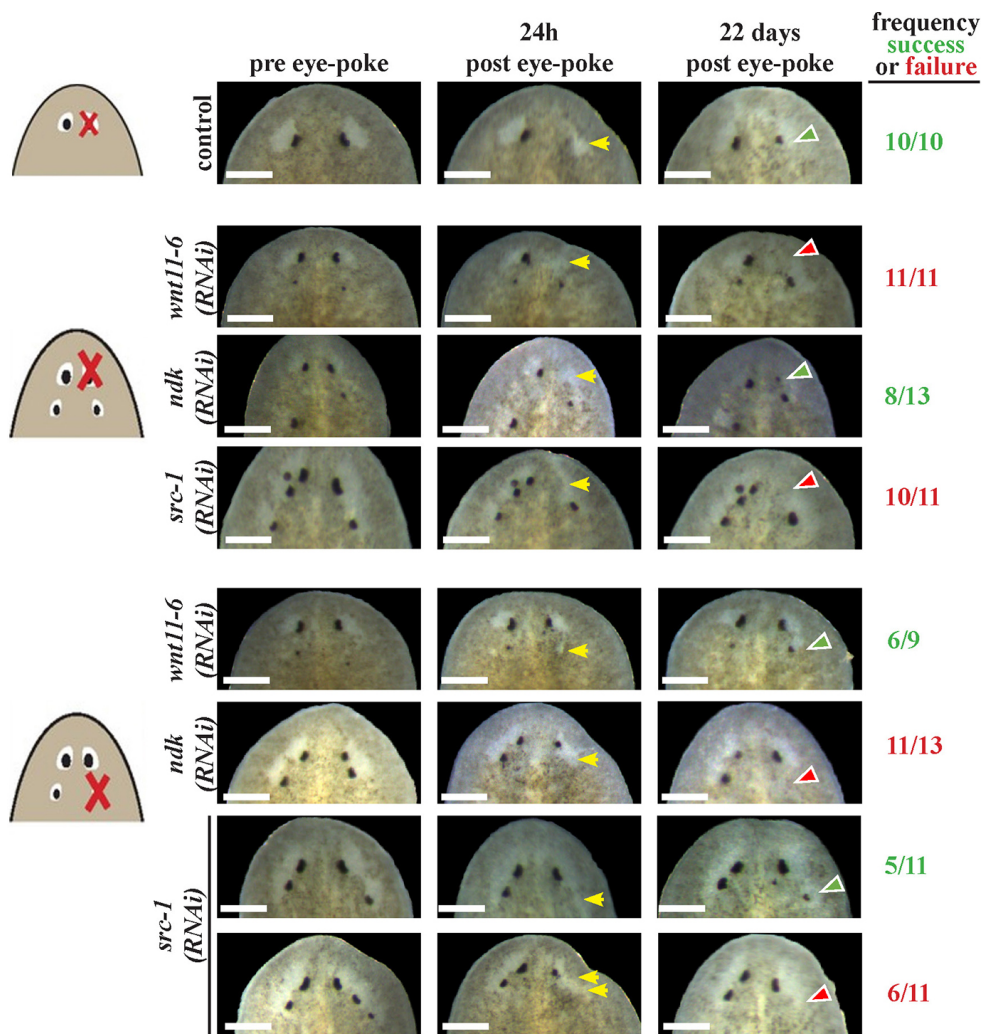

**Fig. 4. Inhibition of *src-1* or *wnt11-6* but not *ndk* alters the location of eye regeneration.** Uninjured animals were fed the indicated dsRNA 12 times over 6 weeks and eye resection was then performed to remove either a pre-existing original eye or a supernumerary posterior eye in either *wnt11-6*(RNAi), *ndk*(RNAi) or *src-1*(RNAi) conditions. Animals were then imaged to verify eye removal (yellow arrows) and tracked individually as they attempted eye regeneration over the course of 22 days. They were scored for the successful (green arrows, green numbers scoring animals shown on right) or unsuccessful (red arrows, red numbers scoring animals shown on right) eye regeneration. Removal of the pre-existing eye resulted in successful eye regeneration in 8/13 *ndk*(RNAi) animals but in 0/11 *wnt11-6*(RNAi) animals and 1/11 *src-1*(RNAi) animal. By contrast, removal of the supernumerary eyes resulted in regeneration in 6/9 *wnt11-6*(RNAi) animals and 5/11 *src-1*(RNAi) animals but only 2/13 *ndk*(RNAi) animals. The bottom panel summarizes the frequency of regeneration from each condition and eye type. Therefore, either *wnt11-6* or *src-1* RNAi treatments shift the target location of eye regeneration to a more posterior position, whereas *ndk* RNAi did not as strongly cause this shift. Scale bars: 150  $\mu$ m.

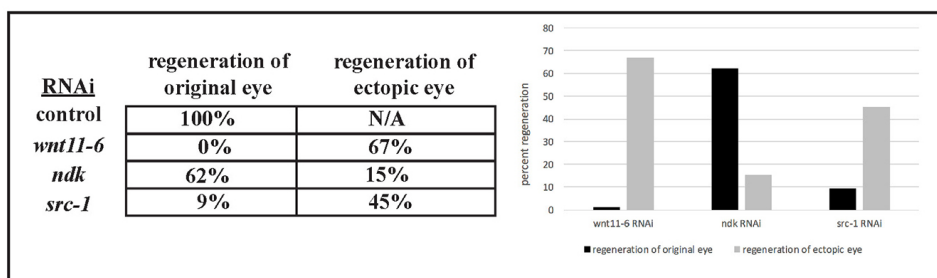

*laminin* (Fig. 5B). *src-1* co-inhibition with *ndl-3* mildly enhanced the increased brain cell number phenotype, but co-inhibition with *ptk7* and *wntP-2* had no additional effect on brain expansion (Fig. S5). Therefore, after *src-1* inhibition, the activities of these trunk PCG regulators remained broadly tied to regulating trunk identity. Surprisingly, however, co-inhibition of *src-1* along with PCGs that ordinarily only regulate head identity (*ndk*, *wnt11-6*) dramatically enhanced the penetrance of ectopic pharynx formation in regenerating trunk fragments (Fig. 5B). Whereas 0% of control and 7% (1/13) of *src-1*(RNAi) animals formed extra pharynges, 75% (12/16) of *ndk+src-1*(RNAi) animals and 40% (6/15) of *wnt11-6+src-1*(RNAi) animals formed extra pharynges. By contrast, we have never observed that individually inhibiting *wnt11-6* or *ndk* leads to formation of ectopic pharynges. Therefore, in the context of *src-1* RNAi but not under normal circumstances,

*wnt11-6* and *ndk* function is important for trunk patterning. These results point to an unexpected interplay of patterning signals otherwise known to be associated with distinct regions. This interaction could arise from a role for *src-1* in assigning PCGs to individual outputs. Alternatively, the PCG system might be set up in a way that allows region-to-region control such that any sufficiently strong head expansion could ultimately also push the trunk territory further posterior. These results identify *src-1* as a strong modifier of positional control used for whole-body regeneration.

## DISCUSSION

Together, these results suggest a distinct role for *src-1* in planarian regeneration in controlling anterior patterning (Fig. 6). We found that *src-1* acts as a global negative regulator of anterior patterning, because its inhibition resulted in the expansion of both head and

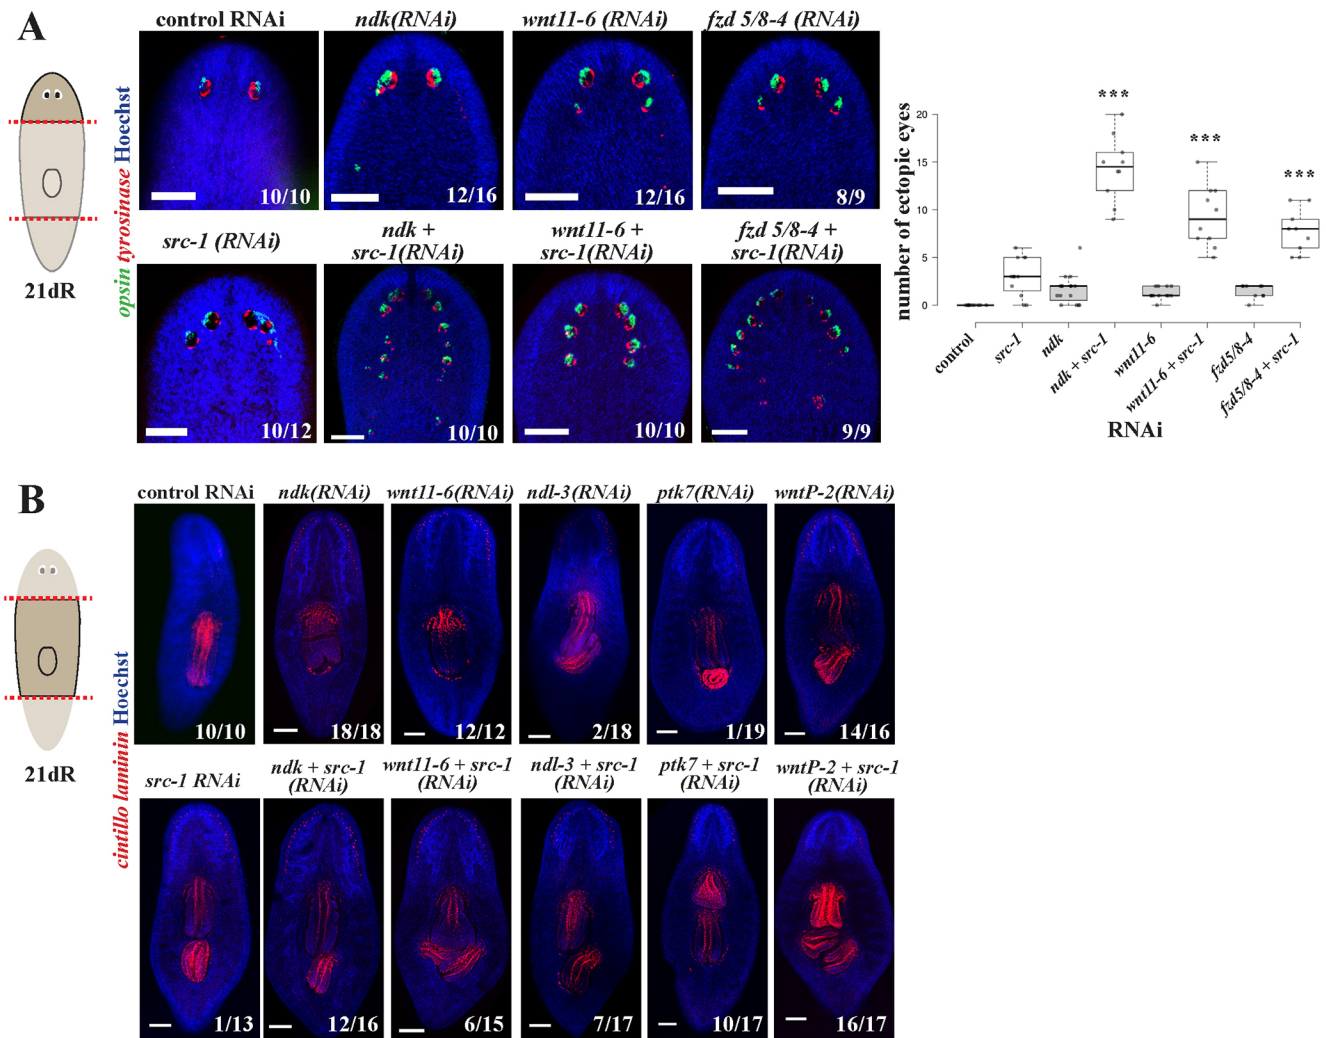

**Fig. 5. *src-1* inhibition sensitizes animals to AP pattern disruption and reprograms PCG activity.** (A) FISH to detect expression of *opsin* (green), a marker of photoreceptor neurons, and *tyrosinase* (red), a marker of pigment cup cells, in head fragments at day 21 post amputation. Hoechst (blue) used as counterstain to detect nuclei. Simultaneous inhibition of *src-1* with *wnt11-6*, *ndk* or *fzd5/8-4* resulted in the formation of numerous ectopic eyes that extended posteriorly to a greater extent and number than in single-gene inhibitions. Right: quantification of eye cell number after each treatment. Ectopic eyes were increased in number after dual inhibition of *src-1* and each tested gene compared with inhibition of each tested gene alone. \*\*\* $P < 0.001$  (unpaired two-tailed *t*-test). Box plot shows median values (middle bars) and first to third interquartile ranges (boxes); whiskers show 1.5 $\times$  interquartile ranges; dots are individual data points. (B) Day-21 regenerating trunk fragments stained with *laminin* riboprobe to mark the pharynx (red, central), along with FISH of *cintillo* (red, anterior) marking chemosensory neurons. Simultaneous inhibition of *src-1* with *wnt11-6*, *ndk*, *ndl-3*, *ptk7* or *wntP-2* resulted in the formation of ectopic posterior pharynges at a greater penetrance than each RNAi condition alone. Numbers indicate fraction of animals with either a single pharynx or ectopic pharynges as shown. Scale bars: 300  $\mu$ m.

trunk identity. These effects were largely independent of hallmarks of head-tail AP axis polarization: injury-induced *wnt1* or *notum*, or the formation of *wnt1* and *notum* poles. As tyrosine kinases activated many upstream signals and are capable of regulating many downstream factors, Src-related factors control both signaling and morphogenesis to regulate many aspects of tissue formation and maintenance, including cell proliferation, differentiation, migration, survival, polarity and cell mechanical properties, with activating mutations to Src capable of driving cancer progression (Thomas and Brugge, 1997; Guarino, 2010; Kohlmaier et al., 2015; Espada and Martin-Perez, 2017; Anton et al., 2018; Tamada et al., 2021). Therefore, planarian *src-1* could, in principle, exert its patterning function in a variety of ways. Given that Src is an intracellular kinase known to act downstream of multiple receptors (Erpel and Courtneidge, 1995; Thomas and Brugge, 1997; Abram and Courtneidge, 2000; Lemmon and Schlessinger, 2010), we focused our analysis on determining whether *src-1* could regulate anterior

patterning downstream or in parallel to planarian Wnt and/or FGFR signals also known to regulate the AP axis.

Srcs have varied relationships to Wnt pathways described across several systems. In the canonical Wnt signaling pathway, Wnt binding to Frizzled receptors recruits Dishevelled (Dvl), sequestering Axin and preventing GSK3 phosphorylation of  $\beta$ -catenin that leads to its proteolysis through the destruction complex, thus allowing  $\beta$ -catenin accumulation and nuclear translocation to activate gene expression via TCF/LEF transcription factors (Gao and Chen, 2010). In mammalian F9 carcinoma cells, Src knockdown led to reduced canonical Wnt3a-stimulated TCF/LEF reporter output, an effect attributed to the ability of Src to bind and phosphorylate Dvl2, potentiating activation of canonical Wnt downstream signals (Yokoyama and Malbon, 2009). Srcs can also act downstream of noncanonical Wnt pathways, such as the Derailed/Ryk receptors transducing Wnt5 family signals, important for neuronal development



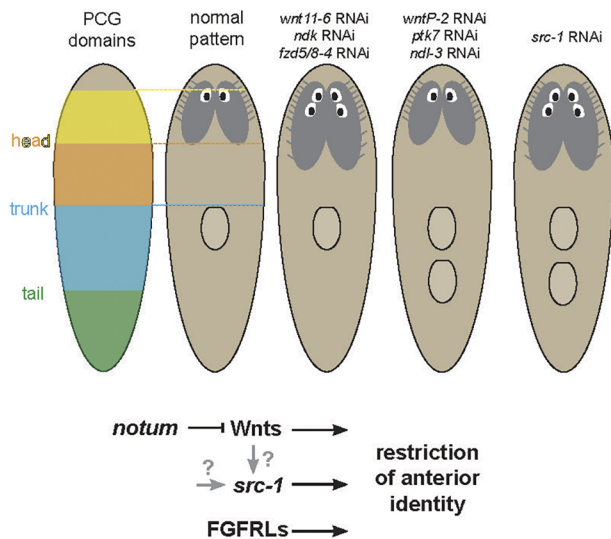

**Fig. 6. *src-1* acts with Wnt and FGFRs to control AP axis identity.** Model of *src-1* participating in AP patterning along with Wnts and FGFRs. Cartoons depict positional control gene domains from muscle that determine the normal animal pattern of eyes, brain and pharynx, as well as patterning phenotypes after inhibition of key factors. The synthetic phenotypes of *src-1* and *notum* RNAi suggest that *src-1* can act independently of some Wnt signaling for control of AP identity. Likewise, the distinct effects of *src-1* RNAi and *ndk* RNAi on the location of eye regeneration after eye removal suggest that *ndk* likely does not act through *src-1*. However, it remains possible that *src-1* could act downstream of Wnts in a *notum*-independent process and/or downstream of other factors acting in parallel. *src-1* influences PCG domains and functions as a buffer to help define their territories and outputs, and thereby suppress anterior identity.

(Wouda et al., 2008; Petrova et al., 2013). Srcs can also function negatively in Wnt signaling, for example through targeting the Wnt co-receptor Lrp6/arrow for inactivation in developing zebrafish embryos (Chen et al., 2014). Src can also function downstream of the kinase-dead co-receptor Ptk7 (Andreeva et al., 2014), which acts as a Wnt co-receptor for either activating or inactivating canonical Wnt signaling (Peradziryi et al., 2011; Hayes et al., 2013). Together with these observations, the identification of a planarian Src that collaborates with Wnt-dependent processes supports a potentially ancient connection between these factors for axis formation.

We considered the possibility that *src-1* could act broadly downstream of several planarian Wnts. Some lines of evidence from this and previous work could be consistent with this interpretation. First, inhibition of planarian *dishevelled-2* caused the simultaneous formation of a secondary ectopic pharynx and posterior ectopic photoreceptors, similar to the *src-1(RNAi)* phenotype (Almuedo-Castillo et al., 2011). Second, the *src-1(RNAi)* phenotype resembled a combination of *wnt11-6* and *wntP-2* RNAi phenotypes and also caused a permanent shift to the site of eye regeneration similar to *wnt11-6* RNAi. While the apparent distinction between *src-1* and  $\beta$ -catenin-1 RNAi phenotypes suggests differences in their activities, the downstream factors in *wntP-2* and *wnt11-6* signaling are not fully understood, in part because of pleiotropic effects from  $\beta$ -catenin-1 inhibition. Although reduced doses of  $\beta$ -catenin-1 dsRNA have been reported to result in the formation of an ectopic posterior mouth and pharynx primordium (Almuedo-Castillo et al., 2011), the most prominent effects of  $\beta$ -catenin-1 are highly penetrant formation of posterior and ectopic heads (Gurley et al., 2008; Petersen and Reddien, 2008; Adell et al., 2009). *src-1* appears

to operate more primarily with the Wnt/FGFR signals that pattern that AP axis versus the *wnt1/notum* pole signals responsible for determining head-versus-tail polarity. Therefore, it is unlikely that *src-1* transduces all Wnt signals in the animal or is involved in all instances of  $\beta$ -catenin signaling. In principle, *src-1* could have interactions with other genes reported to cause ectopic photoreceptor formation posteriorly when knocked down, for example the nuclear receptor *nr4A* (Li et al., 2019). However, *nr4A* RNAi causes additional defects such as loss of muscle from the anterior and a shift in the *wnt1* expression domain not detected in *src-1* RNAi, suggesting these factors likely do not obligately regulate each other in all situations. Instead, we suggest there may be multiple inputs into eye patterning reflective of patterning as a multi-step process.

However, our data is not consistent with a model in which *src-1* acts exclusively downstream of *notum*, and therefore its Wnt targets, to control anterior identity. Simultaneous inhibition of *src-1* and *notum* generated a synthetic phenotype in which animals displayed elements of both phenotypes, as opposed to an outcome indicative of genetic epistasis (Fig. 3A). In previous work, *wnt11-6* inhibition fully suppressed the *notum(RNAi)* ectopic eye phenotype, suggesting that *notum* primarily acts through *wnt11-6* for controlling eye placement (Hill and Petersen, 2015), and that *src-1* is unlikely to act primarily downstream of *wnt11-6*. However, we cannot rule out the possibility that *src-1* could act downstream of any Wnts that can act independently of *notum* and influence head regionalization or downstream of Wnts with involvement in other patterning roles. Testing this model would require future work to identify patterning roles for other negative regulators of specific Wnts or methods to detect Src activation. Interestingly, Dishevelled has also been shown to act in non-canonical Wnt signaling and to mediate a Wnt5-derailed/Related to tyrosine kinase (RYK)-dependent signal, which can signal through Src (Gao and Chen, 2010). Planarian *wnt5* defines the lateral-medial axis in planarian regeneration (Gurley et al., 2010), and inhibition of *dishevelled-1* in planarians has been shown to recapitulate aspects of the *wnt5(RNAi)* phenotype, such as lateral separation of the planarian brain lobes (Almuedo-Castillo et al., 2011). However, *wnt5* is not believed to regulate AP patterning, so it is unlikely that *src-1* acts mainly downstream of *wnt5* to control AP head and trunk regionalization.

We also considered the possibility that *src-1* could act downstream of an unidentified receptor or FGFRs. FGFRs such as *ndk* and *ndl-3* have been shown to regulate regional identity in planarians (Cebria et al., 2002; Lander and Petersen, 2016; Scimone et al., 2016), but the mechanism by which this signaling occurs is unclear. FGFRs have been shown to act as decoy receptors in *Xenopus* embryos. The FGFR1 ectodomain is shed from the cell membrane and binds to some FGF ligands with high affinity, including FGF2, FGF3, FGF4, FGF8, FGF10 and FGF22 to regulate FGF signaling (Steinberg et al., 2010). However, inhibition of FGFs or FGFRs in planarians have so far not resulted in any reported patterning phenotypes (Wagner et al., 2012; Auwal et al., 2020). The intracellular domain of human FGFR1 can interact with the SPRED1 signaling molecule which could allow for downstream intracellular signaling (Zhuang et al., 2011). Furthermore, in  $\beta$ -cell insulin granules, the intracellular domain of FGFR1 can bind SHP-1 via a SH2 domain to activate ERK signaling (Silva et al., 2013). Given the synergistic effects of *src-1* inhibition with *ndk* and *ndl-3* (Fig. 5A,B) and the similar synergistic RNAi phenotypes seen with *ndk* and *fzd5/8-4* (Scimone et al., 2016) it was possible that cross-regulation between WNT and FGFR

signaling pathways controls body regionalization in planarians and that this may be mediated through *src-1*. However, the examination of the extra photoreceptor defect in *src-1* RNAi revealed more similarities with the *wnt11-6* phenotype than the *ndk* phenotype. First, *ndk* RNAi generated posterior photoreceptors located more distantly than either *wnt11-6* or *src-1* RNAi. Second, both *wnt11-6* and *src-1* RNAi tended to shift the location of eye regeneration more posteriorly, unlike *ndk* RNAi. These observations suggest that *src-1* acts distinctly from *ndk*. Other signaling factors known to interface with Src have been described in planarians but are unlikely to explain the patterning roles of *src-1*. For example, integrins are well known to signal through Src for adhesion and signaling (Huttenlocher and Horwitz, 2011) but inhibition of the single planarian integrin- $\beta$  led to tissue disorganization and excess neurogenesis in general rather than specific AP patterning effects seen in *src-1* RNAi (Bonar and Petersen, 2017; Seebeck et al., 2017), but it remains possible that AP patterning involves some input from integrin signals. Future systematic analysis of the many possible upstream Src receptors could help resolve the role of Src for AP patterning with respect to Wnts. Thus, taken together, we propose a role for *src-1* in globally suppressing anterior identity and regulating posterior determination in parallel to the action of Wnts and FGFRs, perhaps using alternative signal inputs.

Our analysis of dual inhibition phenotypes between *src-1* and known AP patterning regulators further suggests this model of parallel action. The expressivity of any patterning phenotype we examined that involved anteriorization of posterior tissue was enhanced dramatically after *src-1* RNAi, which would be expected if *src-1* and Wnts act independently to control pattern. Other explanations are possible, for example that *src-1* acts downstream of all Wnt genes and that the relatively weaker Wnt RNAi phenotypes represent incomplete knockdown. The ability for *src-1* RNAi to reprogram the outputs of anterior PCGs into controlling trunk identity suggests *src-1* may act in a buffering process that helps channel PCG factors into controlling distinct outputs. In addition, the progressive nature of the *src-1* RNAi phenotype to affect anterior regions more strongly than posterior regions was consistent with the finding that PCG domains were shifted rather than eliminated by *src-1* RNAi. The outcomes of double-RNAi between *src-1* and head or trunk PCGs are also suggestive of an anterior bias to *src-1* function in which, at least within the context of *src-1* inhibition, anterior factors such as *ndk* can be reprogrammed to influence more posterior identity, but more posterior factors such as *ptk7* and *wntP-2* are not reprogrammed to influence more anterior identity. This could ultimately reflect the overlapping uses of the two Wnt/FGFR systems to define non-anterior in successive domains. It is also possible that the hypothesized parallel actions of *src-1* and Wnts could arise from distinct signaling to regulate PCG domains within the muscle versus interpretation of domain identity via neoblast-dependent tissue formation. Reagents to examine Src activation status, along with systematic tests of the many possible receptors upstream of Src, will be helpful in resolving these and other mechanisms. It is intriguing to note that the Src family kinase SRC-1 in *Caenorhabditis elegans* acts in parallel to Wnt signaling in order to regulate spindle orientation along the AP axis of the very early embryo (Bei et al., 2002). These observations suggest there may be deep ancestry to the use of joint activities for Src family kinases and Wnt signals in forming the primary body axis. Together, our results identify *src-1* as a new factor regulating positional information along the planarian AP axis that is used for specifying the proper identity of missing tissues in regeneration.

## MATERIALS AND METHODS

### Planarian culture

Asexual strain CIW4 of the planarian *S. mediterranea* were maintained in 1× Montjuic salts at 19°C as previously described (Petersen and Reddien, 2011). Planarians were fed a liver paste and starved for at least 7 days before experiments.

### Cloning

*src-1* (dd\_Smed\_v6\_3147\_0\_1) was identified through blast searching the planarian transcriptome at <https://planmine.mpibpc.mpg.de/> (Brandl et al., 2016; Grohme et al., 2018). Primers used for cloning *src-1* were 5'-AAGCTTGGTGGCTTGCTTAA-3' and 5'-TGCGATCAACCAATGAAAA-3'. Primers for cloning the genes from the screen are indicated in Table S1.

### Riboprobes

Riboprobes and double-stranded RNA (dsRNA) for *src-1* were generated by *in vitro* transcription (NxGen, Lucigen) as previously described (Petersen and Reddien, 2011). Riboprobes and dsRNAs for *src-1* were cloned by reverse transcription polymerase chain reaction (RT-PCR) into pGEM-T-easy using the primers 5'-AAGCTTGGTGGCTTGCTTAA-3' and 5'-TGCGATCAACCAATGAAAA-3'.

Other riboprobes (*chat*, *cintillo*, *gluR*, *opsin*, *tyrosinase*, *collagen*, *laminin*, *notum*, *wnt1*, *ndk*, *ndl-5*, *fzd4*, *wntP-2*, *axinB*, *ptk7*) were as previously described (Oviedo et al., 2003; Cebria et al., 2007; Reddien et al., 2007; Wang et al., 2007; Collins et al., 2010; Gurley et al., 2010; Wenemoser and Reddien, 2010; Petersen and Reddien, 2011; Lapan and Reddien, 2012; Currie and Pearson, 2013; März et al., 2013; Vu et al., 2015).

### RNAi

RNAi was performed by dsRNA feeding. For RNAi, dsRNA was synthesized from *in vitro* transcription reactions (NxGen, Lucigen). dsRNA corresponding to *C. elegans unc-22*, not present in the planarian genome, served as a negative control. For the RNAi screen (Table S1), animals were fed a mixture of liver paste and dsRNA three times over 6 days, then amputated transversely to generate head, trunk and tail fragments. Animals were scored for regeneration defects after 14 days of regeneration (Table S1). For other experiments, unless noted otherwise, animals were fed a mixture of liver paste and dsRNA six times in 14 days before amputation of heads and tails 4 h after the final feeding. For Fig. 4, animals were fed dsRNA 12 times over 6 weeks and starved for 3 days before eye resection. For all comparisons between double RNAi and single RNAi conditions, an equal amount of control competing dsRNA was mixed with the single RNAi condition so that animals across treatments received the same overall amount of dsRNA.

### In situ hybridization and immunostaining

Colorimetric (NBT/BCIP) or fluorescence *in situ* hybridizations were performed as previously described (Lander and Petersen, 2016), after fixation in 4% formaldehyde and bleaching (Pearson et al., 2009) using blocking solution containing 10% horse serum and western blot blocking reagent (Roche) (King and Newmark, 2013). Digoxigenin- or fluorescein-labeled riboprobes were synthesized as previously described (Pearson et al., 2009) and detected with anti-digoxigenin-HRP (1:2000, Roche/Sigma-Aldrich, 11207733910, lot 10520200), anti-fluorescein-HRP (1:2000, Roche/Sigma-Aldrich, 11426346910, lot 11211620) or anti-digoxigenin-AP (1:4000, Roche/Sigma-Aldrich 11093274910, lot 11265026). Hoechst 33342 (Invitrogen) was used at 1:1000 as a counterstain. For immunostainings, animals were fixed in Carnoy's solution as previously described (Hill and Petersen, 2015), using tyramide amplification to detect labeling with rabbit anti-6G10 (1:3000, Cell Signaling Technology, D2C8, lot 3377S).

### Image analysis

Live animals and NBT/BCIP-stained animals were imaged using a Leica M210F dissecting microscope and a Leica DFC295, with adjustments to brightness and contrast using Adobe Photoshop. Whole animal fluorescence

imaging was performed on either a Leica DM5500B compound microscope with Optigrid structured illumination system or a Leica laser scanning SPE confocal microscope at 40 $\times$  or 63 $\times$ , and presented images are maximum projections of a z-series with adjustments to brightness and contrast using ImageJ and Photoshop. Plots were generated in Microsoft Excel or R (ggplot2).

### Cell counting

*centillo*<sup>+</sup> cells in the brain were counted manually and normalized to the square root of the animal area determined using Hoechst staining and CellProfiler (Lamprecht et al., 2007).

### Real-time PCR

Total RNA was extracted by mechanical homogenization in Trizol (Life Technologies), treated with DNase (TURBO DNase, Ambion) and reverse transcribed with oligo-dT primers (Multiscribe reverse transcriptase, Applied Biosystems), and qPCR was performed using Eva Green PCR Master Mix (Biotium) from nine regenerating fragments in four biological replicates. Relative mRNA abundance was calculated using the delta-Ct method after verification of primer amplification efficiency, normalizing to Ubiquilin expression. *P*-values below 0.05 using an unpaired two-tailed *t*-test were considered as significant.

The following primer sets were used: *src-1* – 5'-ATGACGTGTATA-ACGCCGACAC-3', 5'-TGAGGACAGGACAGTGTAAATTG-3'; ubiquilin – 5'-ATTCGTCGGAATTGGAACA-3', 5'-GCGTTCACATCTC CAAAGGT-3'.

### Eye regeneration assays

Modified from Hill and Petersen (2018), briefly, worms were immobilized on ice for resection and eyes were removed using a hypodermic needle. All animals were tracked individually and imaged 1 day before eye removal, 1 day after eye removal to confirm resection of eye tissue, and 22 days post-surgery to determine the regenerative outcome.

### Acknowledgements

We thank members of the Petersen lab for critical comments and K. Lo for help with riboprobes.

### Competing interests

The authors declare no competing or financial interests.

### Author contributions

Conceptualization: C.P.P.; Investigation: N.A.B., D.I.G.; Writing - original draft: N.A.B., C.P.P.; Writing - review & editing: N.A.B., D.I.G., C.P.P.; Supervision: C.P.P.; Project administration: C.P.P.; Funding acquisition: C.P.P.

### Funding

C.P.P. acknowledges funding from the National Institutes of Health, USA (NIGMS R01GM129339 and R01GM130835), and pilot project funding from the National Science Foundation (NSF)-Simons Center for Quantitative Biology at Northwestern University, an NSF (1764421)-Simons Foundation Autism Research Initiative (SFARI) (597491-RWC) MathBioSys Research Center. Deposited in PMC for release after 12 months.

### Peer review history

The peer review history is available online at <https://journals.biologists.com/dev/article-lookup/doi/10.1242/dev.200125>.

### References

Abram, C. L. and Courtneidge, S. A. (2000). Src family tyrosine kinases and growth factor signaling. *Exp. Cell Res.* **254**, 1-13. doi:10.1006/excr.1999.4732

Adell, T., Salo, E., Boutros, M. and Bartscherer, K. (2009). Smed-Evi/Wntless is required for beta-catenin-dependent and -independent processes during planarian regeneration. *Development* **136**, 905-910. doi:10.1242/dev.033761

Almuedo-Castillo, M., Saló, E. and Adell, T. (2011). Dishevelled is essential for neural connectivity and planar cell polarity in planarians. *Proc. Natl Acad. Sci. USA* **108**, 2813-2818. doi:10.1073/pnas.1012090108

Andreeva, A., Lee, J., Lohia, M., Wu, X., Macara, I. G. and Lu, X. (2014). PTK7-Src signaling at epithelial cell contacts mediates spatial organization of actomyosin and planar cell polarity. *Dev. Cell* **29**, 20-33. doi:10.1016/j.devcel.2014.02.008

Anton, K. A., Kajita, M., Narumi, R., Fujita, Y. and Tada, M. (2018). Src-transformed cells hijack mitosis to extrude from the epithelium. *Nat. Commun.* **9**, 4695. doi:10.1038/s41467-018-07163-4

Arnold, C. P., Benham-Pyle, B. W., Lange, J. J., Wood, C. J. and Sanchez Alvarado, A. (2019). Wnt and TGFbeta coordinate growth and patterning to regulate size-dependent behaviour. *Nature* **572**, 655-659. doi:10.1038/s41586-019-1478-7

Atabay, K. D., Locascio, S. A., De Hoog, T. and Reddien, P. W. (2018). Self-organization and progenitor targeting generate stable patterns in planarian regeneration. *Science* **360**, 404-409. doi:10.1126/science.aap8179

Auwal, M. A., Kashima, M., Nishimura, O., Hosoda, K., Motoishi, M., Kamimura, A., Okumura, A., Agata, K. and Umeson, Y. (2020). Identification and characterization of a fibroblast growth factor gene in the planarian *Dugesia japonica*. *Dev. Growth Differ.* **62**, 527-539. doi:10.1111/dgd.12696

Beï, Y., Hogan, J., Berkowitz, L. A., Soto, M., Rocheleau, C. E., Pang, K. M., Collins, J. and Mello, C. C. (2002). SRC-1 and Wnt signaling act together to specify endoderm and to control cleavage orientation in early *C. elegans* embryos. *Dev. Cell* **3**, 113-125. doi:10.1016/S1534-5807(02)00185-5

Blassberg, R. A., Felix, D. A., Tejada-Romero, B. and Aboobaker, A. A. (2013). PBX/extradenticle is required to re-establish axial structures and polarity during planarian regeneration. *Development* **140**, 730-739. doi:10.1242/dev.082982

Bonar, N. A. and Petersen, C. P. (2017). Integrin suppresses neurogenesis and regulates brain tissue assembly in planarian regeneration. *Development* **144**, 784-794.

Brandl, H., Moon, H., Vila-Farre, M., Liu, S. Y., Henry, I. and Rink, J. C. (2016). PlanMine—a mineable resource of planarian biology and biodiversity. *Nucleic Acids Res.* **44**, D764-D773. doi:10.1093/nar/gkv1148

Burgaya, F., Garcia-Fernandez, J., Riutort, M., Baguna, J. and Salo, E. (1994). Structure and expression of Spk-1, an src-related gene product found in the planarian *Dugesia (G) tigrina*. *Oncogene* **9**, 1267-1272.

Cebria, F., Kobayashi, C., Umeson, Y., Nakazawa, M., Mineta, K., Ikeo, K., Gojbori, T., Itoh, M., Taira, M. and Alvarado, A. S. (2002). FGFR-related gene *nou-darake* restricts brain tissues to the head region of planarians. *Nature* **419**, 620. doi:10.1038/nature01042

Cebria, F., Guo, T., Jopek, J. and Newmark, P. A. (2007). Regeneration and maintenance of the planarian midline is regulated by a slit orthologue. *Dev. Biol.* **307**, 394-406. doi:10.1016/j.ydbio.2007.05.006

Chen, C. C., Wang, I. E. and Reddien, P. W. (2013). *pbx* is required for pole and eye regeneration in planarians. *Development* **140**, 719-729. doi:10.1242/dev.083741

Chen, Q., Su, Y., Wesslowski, J., Hagemann, A. I., Ramialison, M., Wittbrodt, J., Scholpp, S. and Davidson, G. (2014). Tyrosine phosphorylation of LRP6 by Src and Fer inhibits Wnt/beta-catenin signalling. *EMBO Rep.* **15**, 1254-1267. doi:10.15252/embr.201439644

Cloutier, J. K., Mcmann, C. L., Oderberg, I. M. and Reddien, P. W. (2021). *activin-2* is required for regeneration of polarity on the planarian anterior-posterior axis. *PLoS Genet.* **17**, e1009466. doi:10.1371/journal.pgen.1009466

Collins III, J. J., Hou, X., Romanova, E. V., Lambrus, B. G., Miller, C. M., Saberi, A., Sweedler, J. V. and Newmark, P. A. (2010). Genome-wide analyses reveal a role for peptide hormones in planarian germline development. *PLoS Biol.* **8**, e1000509. doi:10.1371/journal.pbio.1000509

Currie, K. W. and Pearson, B. J. (2013). Transcription factors *lhx1/5-1* and *pitx* are required for the maintenance and regeneration of serotonergic neurons in planarians. *Development* **140**, 3577-3588. doi:10.1242/dev.098590

Elliott, S. A. and Sanchez Alvarado, A. (2013). The history and enduring contributions of planarians to the study of animal regeneration. *Wiley Interdiscip. Rev. Dev. Biol.* **2**, 301-326. doi:10.1002/wdev.82

Erpel, T. and Courtneidge, S. A. (1995). Src family protein tyrosine kinases and cellular signal transduction pathways. *Curr. Opin. Cell Biol.* **7**, 176-182. doi:10.1016/0955-0674(95)80025-5

Espada, J. and Martin-Perez, J. (2017). An update on Src family of nonreceptor tyrosine kinases biology. *Int. Rev. Cell Mol. Biol.* **331**, 83-122. doi:10.1016/bs.ircmb.2016.09.009

Felix, D. A. and Aboobaker, A. A. (2010). The TALE class homeobox gene *Smed-prep* defines the anterior compartment for head regeneration. *PLoS Genet.* **6**, e1000915. doi:10.1371/journal.pgen.1000915

Gao, C. and Chen, Y.-G. (2010). Dishevelled: The hub of Wnt signaling. *Cell. Signal.* **22**, 717-727. doi:10.1016/j.cellsig.2009.11.021

Grohme, M. A., Schloissnig, S., Rozanski, A., Pippel, M., Young, G. R., Winkler, S., Brandl, H., Henry, I., Dahl, A., Powell, S. et al. (2018). The genome of *Schmidtea mediterranea* and the evolution of core cellular mechanisms. *Nature* **554**, 56-61. doi:10.1038/nature25473

Guarino, M. (2010). Src signaling in cancer invasion. *J. Cell. Physiol.* **223**, 14-26.

Gurley, K. A., Rink, J. C. and Sanchez ALVARADO, A. (2008). Beta-catenin defines head versus tail identity during planarian regeneration and homeostasis. *Science* **319**, 323-327. doi:10.1126/science.1150029

- Gurley, K. A., Elliott, S. A., Simakov, O., Schmidt, H. A., Holstein, T. W. and Alvarado, A. S. (2010). Expression of secreted Wnt pathway components reveals unexpected complexity of the planarian amputation response. *Dev. Biol.* **347**, 24–39. doi:10.1016/j.ydbio.2010.08.007
- Hayashi, T., Motoishi, M., Yazawa, S., Itomi, K., Tanegashima, C., Nishimura, O., Agata, K. and Tarui, H. (2011). A LIM-homeobox gene is required for differentiation of Wnt-expressing cells at the posterior end of the planarian body. *Development* **138**, 3679–3688. doi:10.1242/dev.060194
- Hayes, M., Naito, M., Daulat, A., Angers, S. and Ciruna, B. (2013). Ptk7 promotes non-canonical Wnt/PCP-mediated morphogenesis and inhibits Wnt/beta-catenin-dependent cell fate decisions during vertebrate development. *Development* **140**, 1807–1818. doi:10.1242/dev.090183
- Hill, E. M. and Petersen, C. P. (2015). Wnt/Notum spatial feedback inhibition controls neoblast differentiation to regulate reversible growth of the planarian brain. *Development* **142**, 4217–4229.
- Hill, E. M. and Petersen, C. P. (2018). Positional information specifies the site of organ regeneration and not tissue maintenance in planarians. *Elife* **7**, e33680. doi:10.7554/eLife.33680.024
- Huttenlocher, A. and Horwitz, A. R. (2011). Integrins in cell migration. *Cold Spring Harb. Perspect Biol.* **3**, a005074. doi:10.1101/cshperspect.a005074
- Iglesias, M., Almuedo-Castillo, M., Aboobaker, A. A. and Saló, E. (2011). Early planarian brain regeneration is independent of blastema polarity mediated by the Wnt/ $\beta$ -catenin pathway. *Dev. Biol.* **358**, 68–78. doi:10.1016/j.ydbio.2011.07.013
- King, R. S. and Newmark, P. A. (2013). In situ hybridization protocol for enhanced detection of gene expression in the planarian *Schmidtea mediterranea*. *BMC Dev. Biol.* **13**, 8. doi:10.1186/1471-213X-13-8
- Kobayashi, C., Saito, Y., Ogawa, K. and Agata, K. (2007). Wnt signaling is required for antero-posterior patterning of the planarian brain. *Dev. Biol.* **306**, 714–724. doi:10.1016/j.ydbio.2007.04.010
- Kohlmaier, A., Fassnacht, C., Jin, Y., Reuter, H., Begum, J., Dutta, D. and Edgar, B. A. (2015). Src kinase function controls progenitor cell pools during regeneration and tumor onset in the *Drosophila* intestine. *Oncogene* **34**, 2371–2384. doi:10.1038/onc.2014.163
- Lamprecht, M. R., Sabatini, D. M. and Carpenter, A. E. (2007). CellProfiler™: free, versatile software for automated biological image analysis. *BioTechniques* **42**, 71–75. doi:10.2144/000112257
- Lander, R. and Petersen, C. P. (2016). Wnt, Ptk7, and FGFR1 expression gradients control trunk positional identity in planarian regeneration. *Elife* **5**, e12850. doi:10.7554/eLife.12850
- Lapan, S. W. and Reddien, P. W. (2012). Transcriptome analysis of the planarian eye identifies ovo as a specific regulator of eye regeneration. *Cell Rep* **2**, 294–307. doi:10.1016/j.celrep.2012.06.018
- Lemmon, M. A. and Schlessinger, J. (2010). Cell signaling by receptor tyrosine kinases. *Cell* **141**, 1117–1134. doi:10.1016/j.cell.2010.06.011
- Li, D. J., Mcmann, C. L. and Reddien, P. W. (2019). Nuclear receptor NR4A is required for patterning at the ends of the planarian anterior-posterior axis. *Elife* **8**, e42015. doi:10.7554/eLife.42015
- März, M., Seebeck, F. and Bartscherer, K. (2013). A Pitx transcription factor controls the establishment and maintenance of the serotonergic lineage in planarians. *Development* **140**, 4499–4509. doi:10.1242/dev.100081
- Oviedo, N. J., Newmark, P. A. and Sánchez ALVARADO, A. (2003). Allometric scaling and proportion regulation in the freshwater planarian *Schmidtea mediterranea*. *Dev. Dyn.* **226**, 326–333. doi:10.1002/dvdy.10228
- Owen, J. H., Wagner, D. E., Chen, C.-C., Petersen, C. P. and Reddien, P. W. (2015). . teashirt is required for head-versus-tail regeneration polarity in planarians. *Development* **142**, 1062–1072.
- Parsons, S. J. and Parsons, J. T. (2004). Src family kinases, key regulators of signal transduction. *Oncogene* **23**, 7906. doi:10.1038/sj.onc.1208160
- Pearson, B. J., Eisenhoffer, G. T., Gurley, K. A., Rink, J. C., Miller, D. E. and Sánchez ALVARADO, A. (2009). Formaldehyde-based whole-mount in situ hybridization method for planarians. *Dev. Dyn.* **238**, 443–450. doi:10.1002/dvdy.21849
- Peradziry, H., Kaplan, N. A., Podleschny, M., Liu, X., Wehner, P., Borchers, A. and Tolwinski, N. S. (2011). PTK7/Otk interacts with Wnts and inhibits canonical Wnt signalling. *EMBO J.* **30**, 3729–3740. doi:10.1038/emboj.2011.236
- Petersen, C. P. and Reddien, P. W. (2008). Smed- $\beta$ -catenin-1 is required for anteroposterior blastema polarity in planarian regeneration. *Science* **319**, 327–330. doi:10.1126/science.1149943
- Petersen, C. P. and Reddien, P. W. (2009). A wound-induced Wnt expression program controls planarian regeneration polarity. *Proc. Natl. Acad. Sci. USA* **106**, 17061–17066. doi:10.1073/pnas.0906823106
- Petersen, C. P. and Reddien, P. W. (2011). Polarized notum activation at wounds inhibits Wnt function to promote planarian head regeneration. *Science* **332**, 852–855. doi:10.1126/science.1202143
- Petrova, I. M., Lahaye, L. L., Martiánez, T., De Jong, A. W., Malessy, M. J., Verhaagen, J., Noordermeer, J. N. and Fradkin, L. G. (2013). Homodimerization of the Wnt receptor DERAILED recruits the Src family kinase SRC64B. *Mol. Cell. Biol.* **33**, 4116–4127. doi:10.1128/MCB.00169-13
- Reddien, P. W. (2018). The cellular and molecular basis for planarian regeneration. *Cell* **175**, 327–345. doi:10.1016/j.cell.2018.09.021
- Reddien, P. W., Bermange, A. L., Kicza, A. M. and Alvarado, A. S. (2007). BMP signaling regulates the dorsal planarian midline and is needed for asymmetric regeneration. *Development* **134**, 4043–4051. doi:10.1242/dev.007138
- Reuter, H., März, M., Vogg, M. C., Eccles, D., Grífol-Boldú, L., Wehner, D., Owlarn, S., Adell, T., Weidinger, G. and Bartscherer, K. (2015).  $\beta$ -catenin-dependent control of positional information along the AP body axis in planarians involves a teashirt family member. *Cell Rep.* **10**, 253–265. doi:10.1016/j.celrep.2014.12.018
- Rink, J. C. (2018). Stem cells, patterning and regeneration in planarians: self-organization at the organismal scale. *Methods Mol. Biol.* **1774**, 57–172. doi:10.1007/978-1-4939-7802-1\_2
- Schad, E. G. and Petersen, C. P. (2020). STRIPAK limits stem cell differentiation of a WNT signaling center to control planarian axis scaling. *Curr. Biol.* **30**, 254–263.e2. doi:10.1016/j.cub.2019.11.068
- Scimone, M. L., Lapan, S. W. and Reddien, P. W. (2014). A forkhead transcription factor is wound-induced at the planarian midline and required for anterior pole regeneration. *PLoS Genet.* **10**, e1003999. doi:10.1371/journal.pgen.1003999
- Scimone, M. L., Cote, L. E., Rogers, T. and Reddien, P. W. (2016). Two FGFR1-Wnt circuits organize the planarian anteroposterior axis. *Elife* **5**, e12845. doi:10.7554/eLife.12845
- Scimone, M. L., Cote, L. E. and Reddien, P. W. (2017). Orthogonal muscle fibres have different instructive roles in planarian regeneration. *Nature* **551**, 623–628. doi:10.1038/nature24660
- Scimone, M. L., Atabay, K. D., Fincher, C. T., Bonneau, A. R., Li, D. J. and Reddien, P. W. (2020). Muscle and neuronal guidepost-like cells facilitate planarian visual system regeneration. *Science* **368**, eaba3203. doi:10.1126/science.aba3203
- Seebeck, F., März, M., Meyer, A. W., Reuter, H., Vogg, M. C., Stehling, M., Mildner, K., Zeuschner, D., Rabert, F. and Bartscherer, K. (2017). Integrins are required for tissue organization and restriction of neurogenesis in regenerating planarians. *Development* **144**, 795–807.
- Silva, P. N., Altamentova, S. M., Kilkenny, D. M. and Rocheleau, J. V. (2013). Fibroblast growth factor receptor like-1 (FGFR1) interacts with SHP-1 phosphatase at insulin secretory granules and induces beta-cell ERK1/2 protein activation. *J. Biol. Chem.* **288**, 17859–17870. doi:10.1074/jbc.M112.440677
- Steinberg, F., Zhuang, L., Beyeler, M., Kälin, R. E., Mullis, P. E., Brändli, A. W. and Trueb, B. (2010). The FGFR1 receptor is shed from cell membranes, binds fibroblast growth factors (FGFs), and antagonizes FGF signaling in *Xenopus* embryos. *J. Biol. Chem.* **285**, 2193–2202. doi:10.1074/jbc.M109.058248
- Stuckemann, T., Cleland, J. P., Werner, S., Thi-Kim Vu, H., Bayersdorf, R., Liu, S. Y., Friedrich, B., Julicher, F. and Rink, J. C. (2017). Antagonistic self-organizing patterning systems control maintenance and regeneration of the anteroposterior axis in planarians. *Dev. Cell* **40**, 248–263.e4. doi:10.1016/j.devcel.2016.12.024
- Sureda-Gomez, M., Pascual-Carreras, E. and Adell, T. (2015). Posterior Wnts have distinct roles in specification and patterning of the planarian posterior region. *Int. J. Mol. Sci.* **16**, 26543–26554. doi:10.3390/ijms161125970
- Tamada, M., Shi, J., Bourdot, K. S., Supriyatno, S., Palmquist, K. H., Gutierrez-Ruiz, O. L. and Zallen, J. A. (2021). Toll receptors remodel epithelia by directing planar-polarized Src and PI3K activity. *Dev. Cell* **56**, 1589–1602.e9. doi:10.1016/j.devcel.2021.04.012
- Tejada-Romero, B., Carter, J. M., Mihaylova, Y., Neumann, B. and Aboobaker, A. A. (2015). JNK signalling is necessary for a Wnt- and stem cell-dependent regeneration programme. *Development* **142**, 2413–2424.
- Tewari, A. G., Owen, J. H., Petersen, C. P., Wagner, D. E. and Reddien, P. W. (2019). A small set of conserved genes, including sp5 and Hox, are activated by Wnt signaling in the posterior of planarians and acoels. *PLoS Genet.* **15**, e1008401. doi:10.1371/journal.pgen.1008401
- Thomas, S. M. and Brugge, J. S. (1997). Cellular functions regulated by Src family kinases. *Annu. Rev. Cell Dev. Biol.* **13**, 513–609. doi:10.1146/annurev.cellbio.13.1.513
- Vasquez-Doorman, C. and Petersen, C. P. (2014). . zic-1 Expression in Planarian neoblasts after injury controls anterior pole regeneration. *PLoS Genet.* **10**, e1004452. doi:10.1371/journal.pgen.1004452
- Vogg, M. C., Owlarn, S., Perez Rico, Y. A., Xie, J., Suzuki, Y., Gentile, L., Wu, W. and Bartscherer, K. (2014). Stem cell-dependent formation of a functional anterior regeneration pole in planarians requires Zic and Forkhead transcription factors. *Dev. Biol.* **390**, 136–148. doi:10.1016/j.ydbio.2014.03.016
- Vu, H. T.-K., Rink, J. C., Mckinney, S. A., McClain, M., Lakshmanaperumal, N., Alexander, R. and Alvarado, A. S. (2015). Stem cells and fluid flow drive cyst formation in an invertebrate excretory organ. *Elife* **4**, e07405. doi:10.7554/eLife.07405
- Wagner, D. E., Wang, I. E. and Reddien, P. W. (2011). Clonogenic neoblasts are pluripotent adult stem cells that underlie planarian regeneration. *Science* **332**, 811–816. doi:10.1126/science.1203983

- Wagner, D. E., Ho, J. J. and Reddien, P. W.** (2012). Genetic regulators of a pluripotent adult stem cell system in planarians identified by RNAi and clonal analysis. *Cell Stem Cell* **10**, 299-311. doi:10.1016/j.stem.2012.01.016
- Wang, Y., Zayas, R. M., Guo, T. and Newmark, P. A.** (2007). Nanos function is essential for development and regeneration of planarian germ cells. *Proc. Natl Acad. Sci. USA* **104**, 5901-5906. doi:10.1073/pnas.0609708104
- Wenemoser, D. and Reddien, P. W.** (2010). Planarian regeneration involves distinct stem cell responses to wounds and tissue absence. *Dev. Biol.* **344**, 979-991. doi:10.1016/j.ydbio.2010.06.017
- Witchley, J. N., Mayer, M., Wagner, D. E., Owen, J. H. and Reddien, P. W.** (2013). Muscle cells provide instructions for planarian regeneration. *Cell Rep.* **4**, 633-641. doi:10.1016/j.celrep.2013.07.022
- Wolpert, L.** (1969). Positional information and the spatial pattern of cellular differentiation. *J. Theor. Biol.* **25**, 1-47. doi:10.1016/S0022-5193(69)80016-0
- Wouda, R. R., Bansraj, M. R., De Jong, A. W., Noordermeer, J. N. and Fradkin, L. G.** (2008). Src family kinases are required for WNT5 signaling through the Derailed/RYK receptor in the Drosophila embryonic central nervous system. *Development* **135**, 2277-2287. doi:10.1242/dev.017319
- Wurtzel, O., Cote, L. E., Poirier, A., Satija, R., Regev, A. and Reddien, P. W.** (2015). A generic and cell-type-specific wound response precedes regeneration in planarians. *Dev. Cell* **35**, 632-645. doi:10.1016/j.devcel.2015.11.004
- Yokoyama, N. and Malbon, C. C.** (2009). Dishevelled-2 docks and activates Src in a Wnt-dependent manner. *J. Cell Sci.* **122**, 4439-4451. doi:10.1242/jcs.051847
- Zeng, A., Li, H., Guo, L., Gao, X., Mckinney, S., Wang, Y., Yu, Z., Park, J., Semerad, C., Ross, E. et al.** (2018). Prospectively isolated tetraspanin(+) neoblasts are adult pluripotent stem cells underlying planaria regeneration. *Cell* **173**, 1593-1608.e20. doi:10.1016/j.cell.2018.05.006
- Zhuang, L., Villiger, P. and Trueb, B.** (2011). Interaction of the receptor FGFR1 with the negative regulator Spred1. *Cell. Signal.* **23**, 1496-1504. doi:10.1016/j.cellsig.2011.05.006
